## Cholesterol uptake capacity: a new measure of HDL functionality as a predictor of subsequent revascularization in patients undergoing percutaneous coronary intervention

D. Fujimoto<sup>1</sup>, H. Otake<sup>1</sup>, H. Kawamori<sup>1</sup>, T. Toba<sup>1</sup>, M. Nagao<sup>2</sup>, Y. Sugizaki<sup>1</sup>, A. Nagasawa<sup>1</sup>, R. Takeshige<sup>1</sup>, A. Harada<sup>3</sup>, K. Murakami<sup>3</sup>, T. Iino<sup>3</sup>, Y. Irino<sup>3</sup>, R. Toh<sup>2</sup>, K. Hirata<sup>1</sup>

<sup>1</sup>Kobe University Graduate School of Medicine, Division of Cardiovascular Medicine, Department of Internal Medicine, Kobe, Japan; <sup>2</sup>Kobe University Graduate School of Medicine, Division of Evidence-based Laboratory Medicine, Kobe, Japan; <sup>3</sup>Central Research Laboratories, Sysmex Corporation, Kobe, Japan

**Funding Acknowledgement:** Type of funding source: None

**Background:** Recent studies have demonstrated the importance of high-density lipoprotein (HDL) functionality in the development of de novo coronary artery disease by using the cholesterol-efflux capacity, a measure of the ability of HDL to promote cholesterol removal from lipid-laden macrophages. Recently, we developed a rapid cell-free assay system to directly evaluate the capacity of HDL to accept additional cholesterol; the measurement of the cholesterol-uptake capacity (CUC) enables HDL functionality to be readily evaluated in our daily practice. However, prognostic implication of CUC measurement at the timing of percutaneous coronary intervention (PCI) remains unclear.

**Purpose:** We aimed to evaluate the association between baseline CUC and revascularization during follow-up in the patients who underwent PCI.

**Methods:** We retrospectively reviewed the patients who underwent PCI with follow-up coronary angiography (CAG) or ischemic-driven revascularization. The patients who had the frozen blood samples of which CUC were measurable at the index PCI and follow-up CAG or revascularization were enrolled. We excluded the patients under hemodialysis.

**Results:** Among a total of 703 consecutive patients who underwent PCI between Dec 2014 and Mar 2019, we finally enrolled 74 patients who underwent ischemic-driven revascularization (revascularization group) and

183 patients who underwent follow-up CAG without revascularization (non-revascularization group). There were no significant difference in baseline traditional cardiovascular risk factors between the groups. However, the presence of diabetes was significantly more frequent in the revascularization group (63.5% vs 41.0%;  $P=0.001$ ) than in the non-revascularization group. CUC at the index PCI was significantly lower in the revascularization group than in the non-revascularization group ( $87.0 \pm 19.5$  vs  $93.9 \pm 19.2$ ;  $P=0.004$ ). Multivariate logistic regression analysis revealed that impaired HDL functionality assessed by decreased CUC level at the index PCI (odds ratio; 0.984, 95% confidence interval; 0.969–1.000) was independently associated with subsequent revascularization after PCI. Indeed, there was a graded inverse association between increasing tertiles of CUC levels and the incidence of revascularization during a median follow-up of 881 days (Figure). Especially in the subgroup analysis of non-diabetic patients, decreased CUC level at the index PCI was independently associated with subsequent revascularization (odds ratio; 0.947, 95% confidence interval; 0.915–0.981), while not in diabetic population.

**Conclusion:** Serum CUC level at the index procedure was associated with subsequent revascularization especially in non-diabetic patients who underwent PCI.

Figure. The Kaplan–Meier curves showing the rates of ischemic-driven revascularization by tertiles of CUC

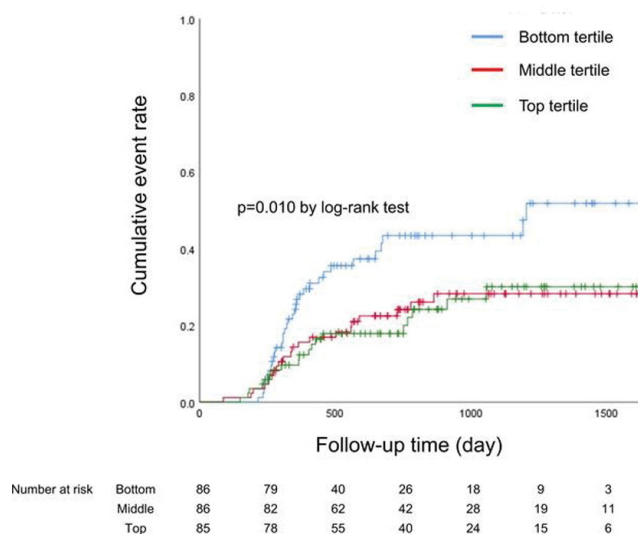

Source: http://academic.oup.com/eurheartj/article-pdf/41/Supplement_2/ehaa946.1497/34521561/ehaa946.1497.pdf
